# Supplementary material for: The Value of Current Ante Mortem Meat Inspection and Food Chain Information of Dairy Cows in Relation to Post Mortem Findings and the Protection of Public Health: A Case for a More Risk-Based Meat Inspection
Source: MDPI journal article supplement (doi:10.3390/foods12030616), 2023-02-01
Supplement: s1 [file s1]

### **File S3. Analysis with 2×2 tables:**

Legenda:

FCI+ is one or more questions answered with yes

FCI- is no question answered with yes

AM+ is AM-2 (local abnormalities) and AM-3 (general symptoms of distress, fatigue etc.)

AM- is AM-1 (no remarks)

PM+ is NHC (not suitable for Human Consumption)

PM- is shc (suitable for human consumption)

LR is the likelihood ratio.

LR+ means that with a positive test result the likelihood of a true positive increases.

If LR+ 1-2 the probability increases little; if LR+ 2-5 the prob increases; if LR+ 5-10 the prob increase strongly; when LR+ > 10 the probability increases severely.

LR- means that with a negative test result the likelihood of finding a true positive decreases (and finding a true negative increases).

If LR- is 1-0.5 the prob of finding a positive decreases slightly, between 0.49 and 0.20 it decreases moderately, and if the LR- 0.19-0.10 it decreases strongly and 0.09-0.01 it decreases severely (and finding a true negative increases).

**FCI and AM considered separately:** CAVE: THE PM RESULTS ARE THE GOLD STANDARD

**FCI AS A DIAGNOSTIC TEST...**

|               | PM+  | PM-    | <i>totals</i> |
|---------------|------|--------|---------------|
| FCI+          | 380  | 3268   | 3648          |
| FCI-          | 6658 | 202240 | 208898        |
| <i>totals</i> | 7038 | 205508 | 212546        |

|                                               |                |                       |
|-----------------------------------------------|----------------|-----------------------|
| <b>SENSITIVITY</b>                            | <b>5.40</b> %  | $A/(A+C)$             |
| <b>SPECIFICITY</b>                            | <b>98.41</b> % | $D/(B+D)$             |
| <b>PREDICTIVE VALUE +</b>                     | <b>10.42</b> % | $A/(A+B)$             |
| <b>PREDICTIVE VALUE -</b>                     | <b>96.81</b> % | $D/(C+D)$             |
| <b>ACCURACY</b>                               | <b>95.33</b> % | $(A+D)/N$             |
| <b>APPARENT PREVALENCE</b>                    | <b>1.72</b> %  | $(A+B)/N$             |
| <b>TRUE PREVALENCE</b>                        | <b>3.31</b> %  | $(A+C)/N$             |
| <b>Likelihood Ratio pos. test result, LR+</b> | <b>3.40</b>    | $(a/(a+c))/(b/(b+d))$ |
| <b>LR-</b>                                    | <b>0.96</b>    | $(c/(a+c))/(d/(b+d))$ |

### AM AS A DIAGNOSTIC TEST

|               | PM+  | PM-    | <i>totals</i> |                                         |
|---------------|------|--------|---------------|-----------------------------------------|
| AM+           | 2233 | 7623   | 9856          |                                         |
| AM-           | 1700 | 212044 | 213744        |                                         |
| <i>totals</i> | 3933 | 219667 | 223600        | (slaughtered animals including imports) |

|                                        |         |                       |
|----------------------------------------|---------|-----------------------|
| SENSITIVITY                            | 56.78 % | $A/(A+C)$             |
| SPECITIVITY                            | 96.53 % | $D/(B+D)$             |
| PREDICTIVE VALUE +                     | 22.66 % | $A/(A+B)$             |
| PREDICTIVE VALUE -                     | 99.20 % | $D/(C+D)$             |
| PRECISION                              | 95.83 % | $(A+D)/N$             |
| APPARENT PREVALENCE                    | 4.41 %  | $(A+B)/N$             |
| TRUE PREVALENCE                        | 1.76 %  | $(A+C)/N$             |
| Likelihood Ratio pos. test result, LR+ | 16.36   | $(a/(a+c))/(b/(b+d))$ |
| LR-                                    | 0.45    | $(c/(a+c))/(d/(b+d))$ |

|     | PM+      | PM-      | TOTALS |
|-----|----------|----------|--------|
| AM+ | <b>A</b> | <b>B</b> | $a+b$  |
| AM- | <b>C</b> | <b>D</b> | $c+d$  |
|     | $a+c$    | $b+d$    | $N$    |

**In parallel testing (FCI and AM both at the same time):**

1. Combined specificity: Negative (A and B) = Specificity A\*Specificity B
2. Combined sensitivity: Positive (A or B) = Sensitivity A + Sensitivity B – (Sensitivity A\*Sensitivity B)

**In series testing (FCI first and AM thereafter, pending the pos or neg result of FCI):**

1. Combined specificity: Negative (A or B) = Specificity A + Specificity B – (Specificity A\*Specificity B)
2. Combined sensitivity: Positive (A and B) = Sensitivity A X Sensitivity B

|               | spec          | sens          |
|---------------|---------------|---------------|
| parallel test | <b>0.9499</b> | <b>0.5911</b> |
| serial test   | <b>0.9994</b> | <b>0.0307</b> |

### FCI and AM AGREEMENT IN DETECTING/PREDICTING ANIMALS DECLARED NHC AT PM:

|        | FCI+ | FCI- | totals |
|--------|------|------|--------|
| AM+    | 61   | 1988 | 2049   |
| AM-    | 319  | 1280 | 1599   |
| totals | 380  | 3268 | 3648   |

#### 2x2 used for evaluation of the agreement between the results of two tests:

|                                                              |                |                   |
|--------------------------------------------------------------|----------------|-------------------|
| Observed test agreement                                      | 0.3676         | $(a+d)/n$         |
| Coincidental agreement                                       | 0.0585         | $(a+b/n)*(a+c/n)$ |
| Coincidental disagreement                                    | 0.3927         | $(c+d/n)*(b+d/n)$ |
| Total agreement by coincidence                               | 0.4512         | is cell B8+B9     |
| Observed agreement minus coincidental                        | -0.0836        | is cell B7-B10    |
| Maximum test agreement outside<br>the coincidental agreement | 0.5488         | is 1- cell B10    |
| <b>COHENS' KAPPA:</b>                                        | <b>-0.1523</b> | is cell B20/B22   |

**AGREEMENT BETWEEN FCI AND AM IN DETECTING/PREDICTING ANIMALS DECLARED shc AT PM:**

|        | FCI+ | FCI-   | totals |
|--------|------|--------|--------|
| AM+    | 510  | 3953   | 4463   |
| AM-    | 6148 | 198287 | 204435 |
| totals | 6658 | 202240 | 208898 |

2x2 used for evaluation of the agreement between the results of two tests:

|        |                   |
|--------|-------------------|
| 0.9516 | $(a+d)/n$         |
| 0.0007 | $(a+b/n)*(a+c/n)$ |
| 0.9474 | $(c+d/n)*(b+d/n)$ |
| 0.9481 | is cell F8+F9     |
| 0.0035 | is cell F7-F10    |

0.0519 is 1-F10

**COHENS' KAPPA: 0.0679** is F11/F13

|         | test A+ | test A- |     |
|---------|---------|---------|-----|
| test B+ | a       | b       | a+b |
| test B- | c       | d       | c+d |
|         | a+c     | b+d     | n   |

KAPPA=(observed coincidental agreement/max test agreement outside coincidental agreement)

Kappa coefficient interpretation: values  $\leq 0$  no agreement; 0.01–0.20 very poor to poor; 0.21–0.40 little to fair; 0.41–0.60 fair to moderate; 0.61–0.80 moderate to good; 0.81–0.90 good to excellent; 0.91–1.00 excellent to total agreement.

A negative kappa means that there is disagreement between the tests (worse agreement than could or should be expected).

Negative values between 0.00 and -0.1 point to "no agreement at all". Even larger negative outcomes (-0.11 and more) point at (total) disagreement, and using these two tests in combination serves no purpose.

|               |                               | <b>results</b> |            | <b>results</b> |  |
|---------------|-------------------------------|----------------|------------|----------------|--|
| <b>FCI</b>    | <b>AM+<br/>(=AM2&amp;AM3)</b> | <b>NHC</b>     | <b>shc</b> | <i>totals</i>  |  |
| pos           | pos                           | 61             | 510        | 571            |  |
| pos           | neg                           | 319            | 6148       | 6467           |  |
| neg           | pos                           | 1988           | 3953       | 5941           |  |
| neg           | neg                           | 1280           | 198287     | 199567         |  |
| <i>totals</i> |                               | 3648           | 208898     | 212546         |  |
