# Supplementary material for: The Value of Current Ante Mortem Meat Inspection and Food Chain Information of Dairy Cows in Relation to Post Mortem Findings and the Protection of Public Health: A Case for a More Risk-Based Meat Inspection
Source: MDPI journal article supplement (doi:10.3390/foods12030616), 2023-02-01
Supplement: s1 [file s1]

**Table S1** Provinces and animals declared NHC grouped by roughly estimated mean travel distances in kilometers (Noord Brabant is the province in which the slaughterhouse is located).

| Province      | Number        | NHC (%)            | Travel Distance |
|---------------|---------------|--------------------|-----------------|
| Noord Brabant | 72845         | 1761 (2,4%)        | 50              |
| Zeeland       | 6170          | 115 (1,9%)         | 100             |
| Zuid Holland  | 13110         | 223 (1,7%)         | 100             |
| Utrecht       | 10448         | 329 (3,1%)         | 100             |
| Gelderland    | 40533         | 456 (1,1%)         | 100             |
| Limburg       | 14719         | 243 (1,7%)         | 100             |
| Noord Holland | 5212          | 34 (0,7%)          | 200             |
| Flevoland     | 7449          | 31 (0,4%)          | 200             |
| Overijssel    | 22598         | 114 (0,5%)         | 200             |
| Friesland     | 7138          | 113 (1,6%)         | 300             |
| Drenthe       | 6856          | 65 (0,9%)          | 300             |
| Groningen     | 5469          | 164 (3%)           | 300             |
| <i>Totals</i> | <i>223600</i> | <i>3933 (1,8%)</i> |                 |
